# Supplementary material for: Polythiophenoazomethines – alternate photoactive materials for organic photovoltaics
Source: Royal Society of Chemistry journal article supplement (doi:10.1039/c4ta03202k), 2014-01-01
Supplement: c4ta03202k1.pdf [file c4ta03202k1.pdf]

# Supporting Information

for

## Polythiophenoazomethines –Alternate Photoactive Materials for Photovoltaics

Andréanne Bolduc,<sup>a,c</sup> Satyananda Barik,<sup>a,d</sup> Martin R. Lenze,<sup>b</sup> Klaus Meerholz,<sup>b\*</sup> W. G. Skene<sup>a\*</sup>

<sup>a</sup>Laboratoire de caractérisation photophysique des matériaux conjugués  
Département de chimie, Pavillon JA Bombardier,  
University of Montreal, CP 6128, succ. Centre-ville,  
Montreal, Quebec, Canada H3T 2B1

<sup>b</sup>Department of Chemistry  
University of Cologne  
Luxemburger Str. 116, 50939  
Cologne, Germany

<sup>c</sup>Current address: Molecular Science and Technology  
Department of Chemical Engineering and Chemistry  
Eindhoven University of Technology  
Den Dolech 2, 5612 AZ, P.O. Box 513  
5600 MB Eindhoven  
The Netherlands

<sup>d</sup>Current address: Institute of Chemical and Engineering Sciences (A\*STAR)  
1 Pesek Road, Jurong Island  
Singapore-627833

Corresponding authors: [w.skene@umontreal.ca](mailto:w.skene@umontreal.ca); [klaus.meerholz@uni-koeln.de](mailto:klaus.meerholz@uni-koeln.de)

## Table of Contents

|                                                                                                                                                                                                                                                          |    |
|----------------------------------------------------------------------------------------------------------------------------------------------------------------------------------------------------------------------------------------------------------|----|
| Figure S1. <sup>1</sup> H NMR spectrum of 3-(2-ethylhexyl) thiophene.....                                                                                                                                                                                | 3  |
| Figure S2. <sup>13</sup> C NMR spectrum of 3-(2-ethylhexyl) thiophene. ....                                                                                                                                                                              | 4  |
| Figure S3. <sup>1</sup> H NMR spectrum of 3-(2-ethylhexyl) thiophene-2,5-dicarbaldehyde. ....                                                                                                                                                            | 5  |
| Figure S4. <sup>13</sup> C NMR spectrum of 3-(2-ethylhexyl) thiophene-2,5-dicarbaldehyde. ....                                                                                                                                                           | 6  |
| Figure S5. <sup>1</sup> H NMR spectrum of <b>2</b> .....                                                                                                                                                                                                 | 7  |
| Figure S6. FT-IR spectrum of <b>1</b> .....                                                                                                                                                                                                              | 8  |
| Figure S7. FT-IR spectrum of <b>2</b> .....                                                                                                                                                                                                              | 9  |
| Figure S8. Normalized absorbance of <b>2</b> in dichloromethane.....                                                                                                                                                                                     | 10 |
| Figure S9. Absorbance of <b>1</b> as a function of concentration between 0.13 and 2 mg/mL in chloroform. Inset: absorbance of <b>1</b> at 625 nm as a function of concentration.....                                                                     | 11 |
| Figure 10. Cyclic voltammogram of <b>2</b> in dichloromethane measured at 100 mV/sec with TBAPF <sub>6</sub> against Ag/AgCl (sat'd) electrode in anhydrous dichloromethane.....                                                                         | 12 |
| Figure S11. Thermal gravimetric analysis of <b>2</b> .....                                                                                                                                                                                               | 13 |
| Figure S13. Differential scanning calorimetry thermograms of <b>2</b> . ....                                                                                                                                                                             | 14 |
| Figure S14. GPC elugram of <b>2</b> .....                                                                                                                                                                                                                | 15 |
| Figure S15. Unoptimized photovoltaic device power conversion efficiency as a function of the PC <sub>60</sub> BM content: <b>1</b> (■) and <b>3</b> (●).....                                                                                             | 16 |
| Figure S16. Unoptimized photovoltaic device power conversion efficiency with 1:4 <b>1</b> :PC <sub>60</sub> BM ratio as a function of spin coating speed/film thickness and donor/acceptor concentration: 10 (●) and 20 (■) mg/mL in chlorobenzene. .... | 17 |
| Figure S17. AFM topology image of 1:4 <b>1</b> :PC <sub>60</sub> BM blend in noncontact mode of 5 x 5 μm area. ....                                                                                                                                      | 18 |
| Figure S18. AFM image of 1:4 <b>1</b> :PC <sub>60</sub> BM blend in noncontact mode of 5 x 5 μm area showing the roughness. ....                                                                                                                         | 19 |

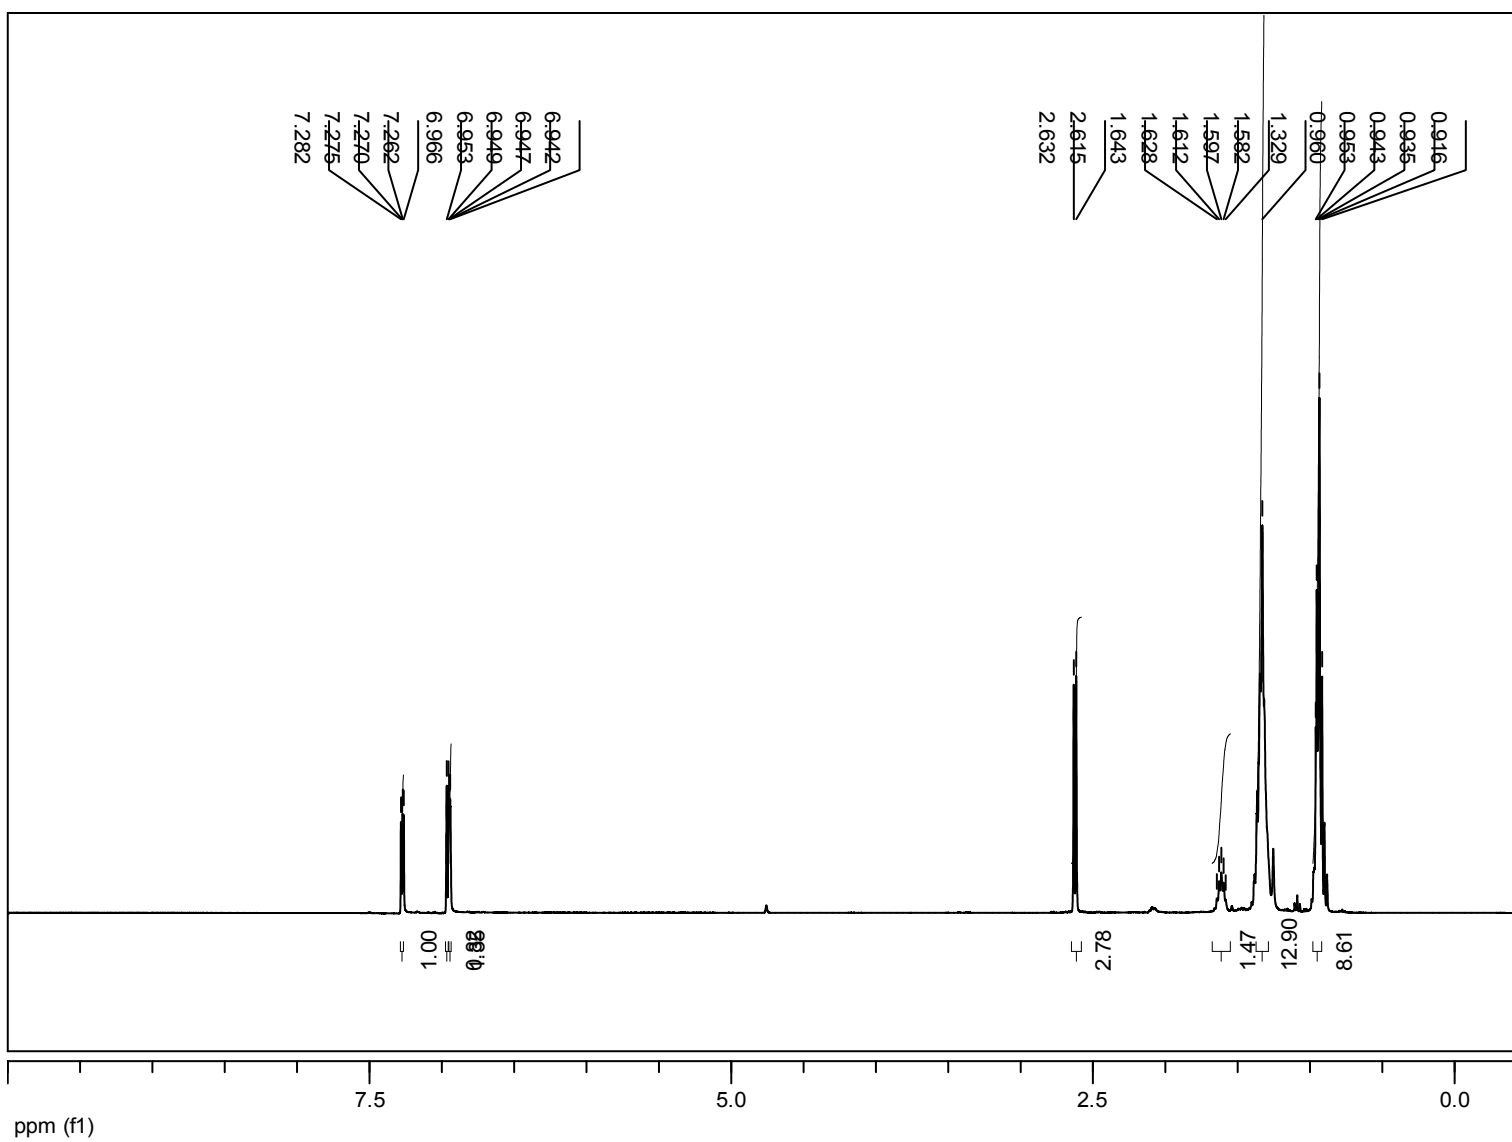

Figure S1. <sup>1</sup>H NMR spectrum of 3-(2-ethylhexyl) thiophene.

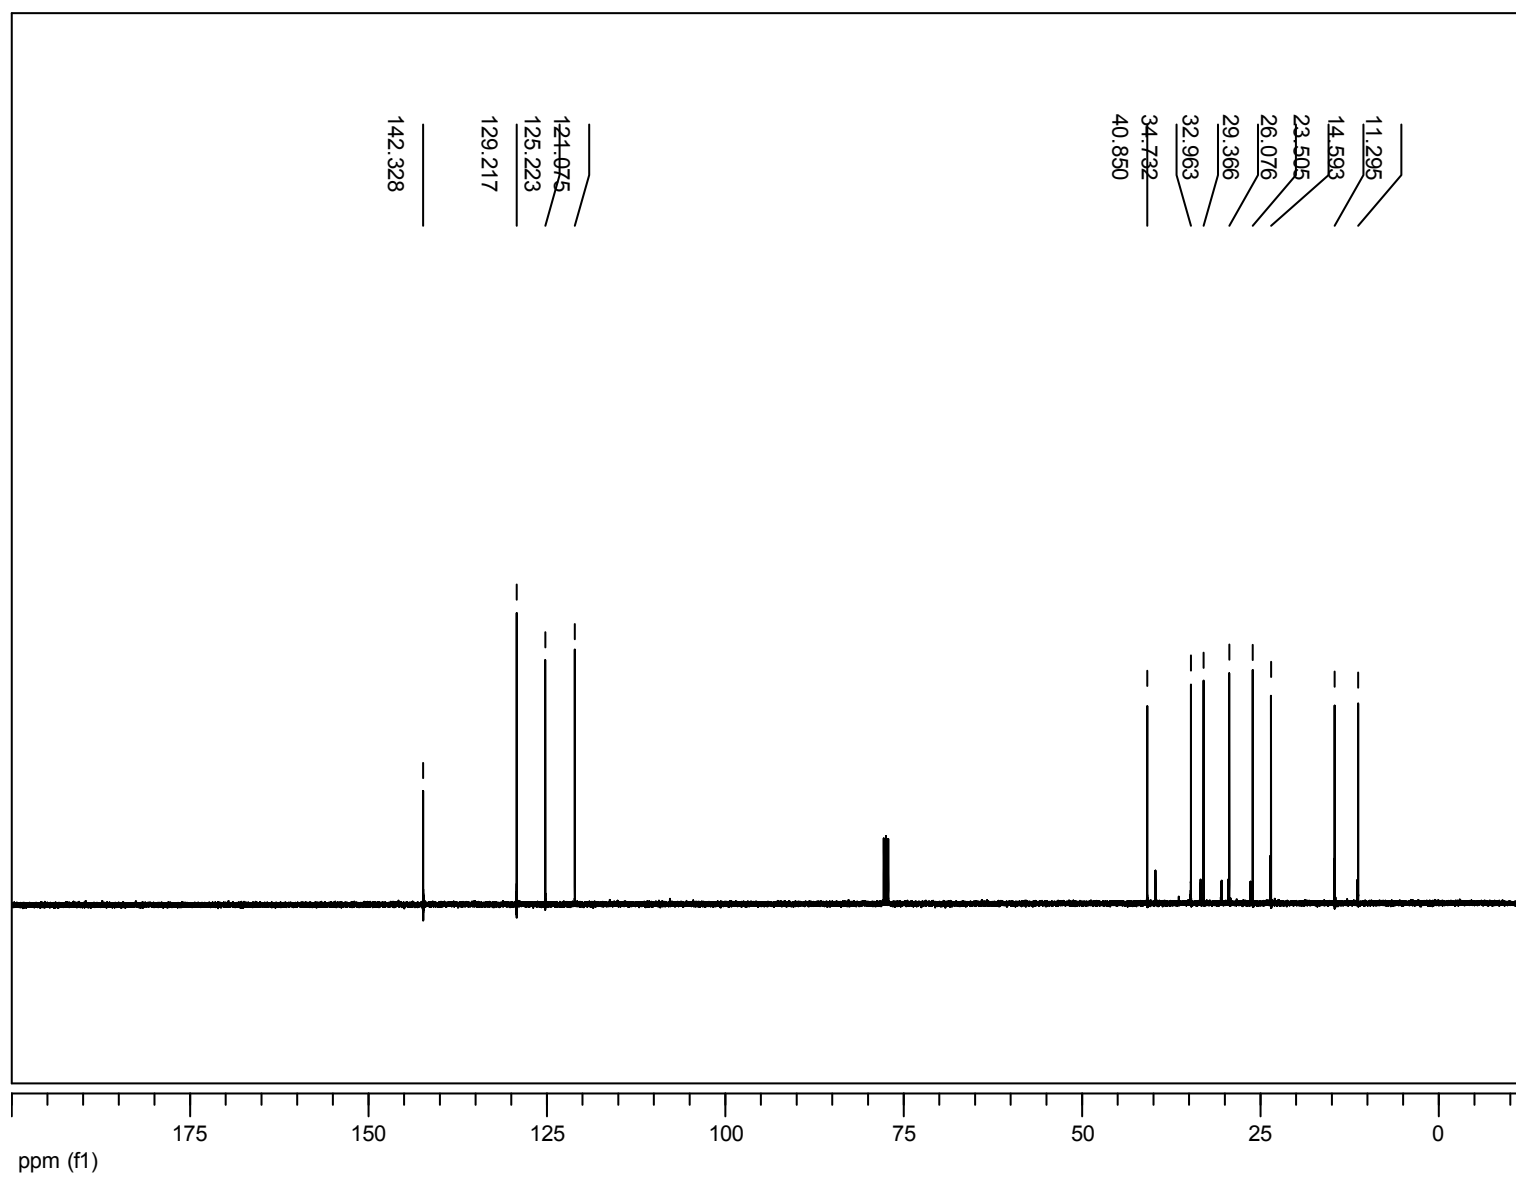

Figure S2. <sup>13</sup>C NMR spectrum of 3-(2-ethylhexyl) thiophene.

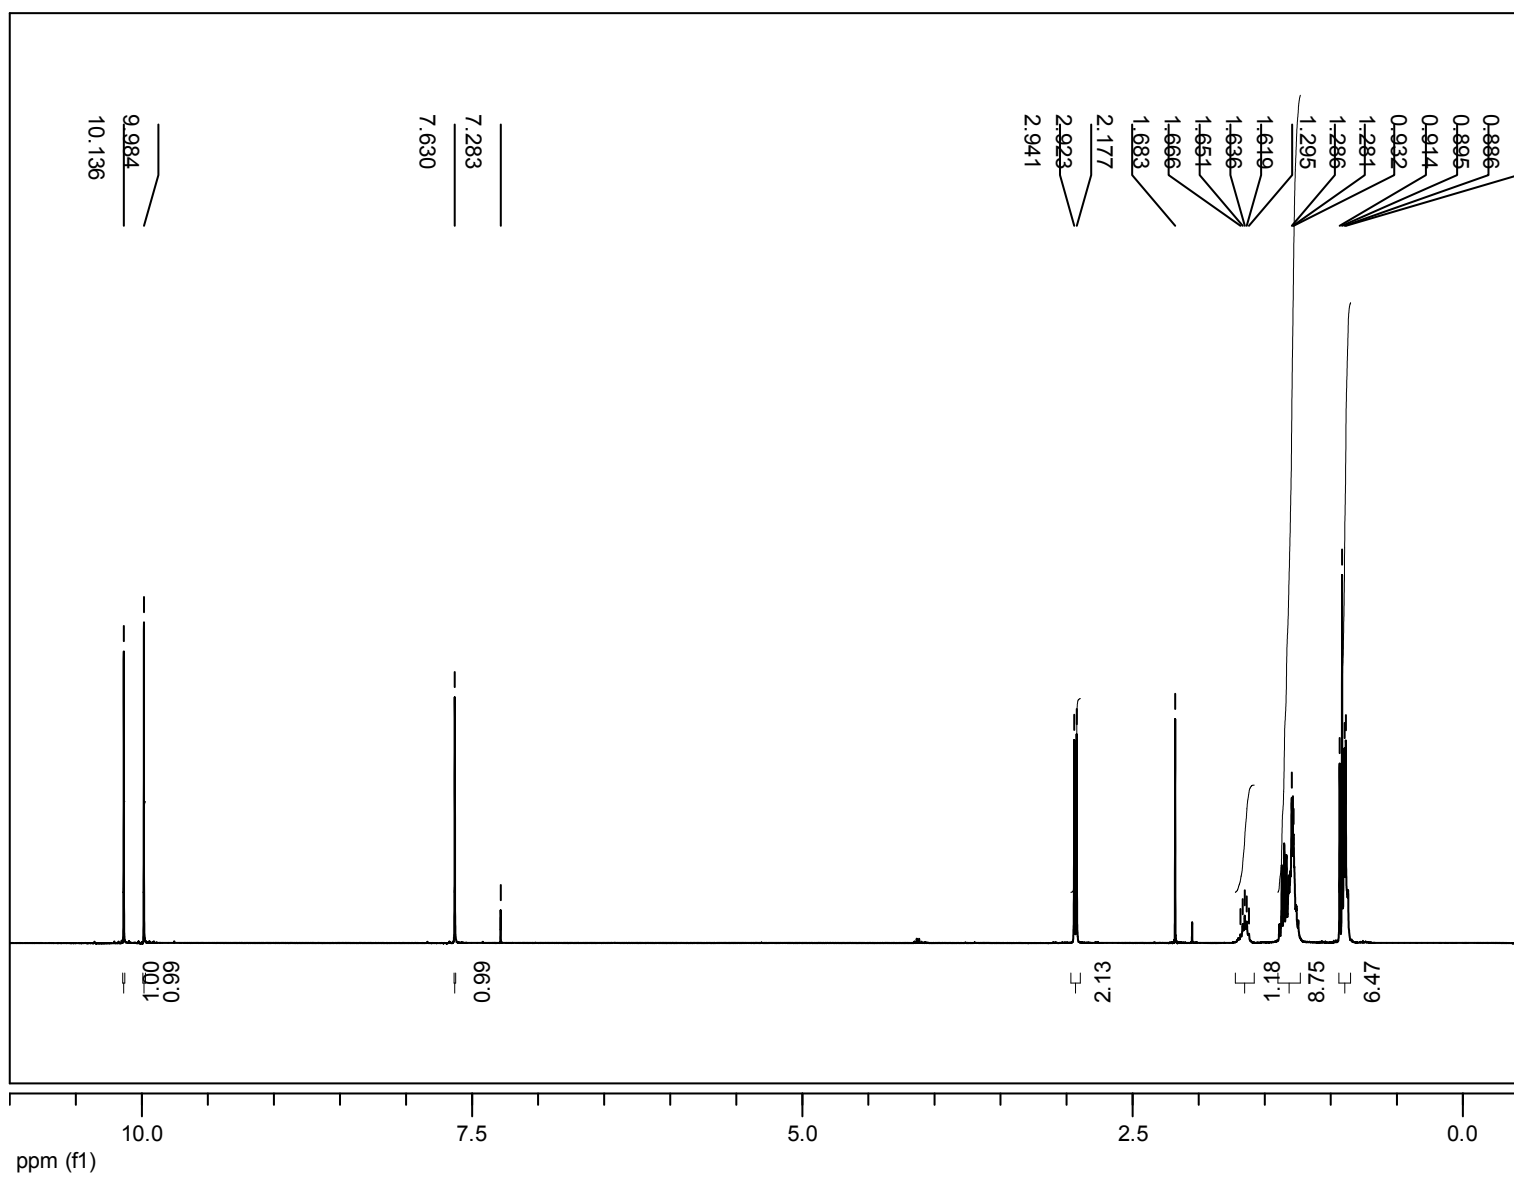

Figure S3.  $^1\text{H}$  NMR spectrum of 3-(2-ethylhexyl) thiophene-2,5-dicarbaldehyde.

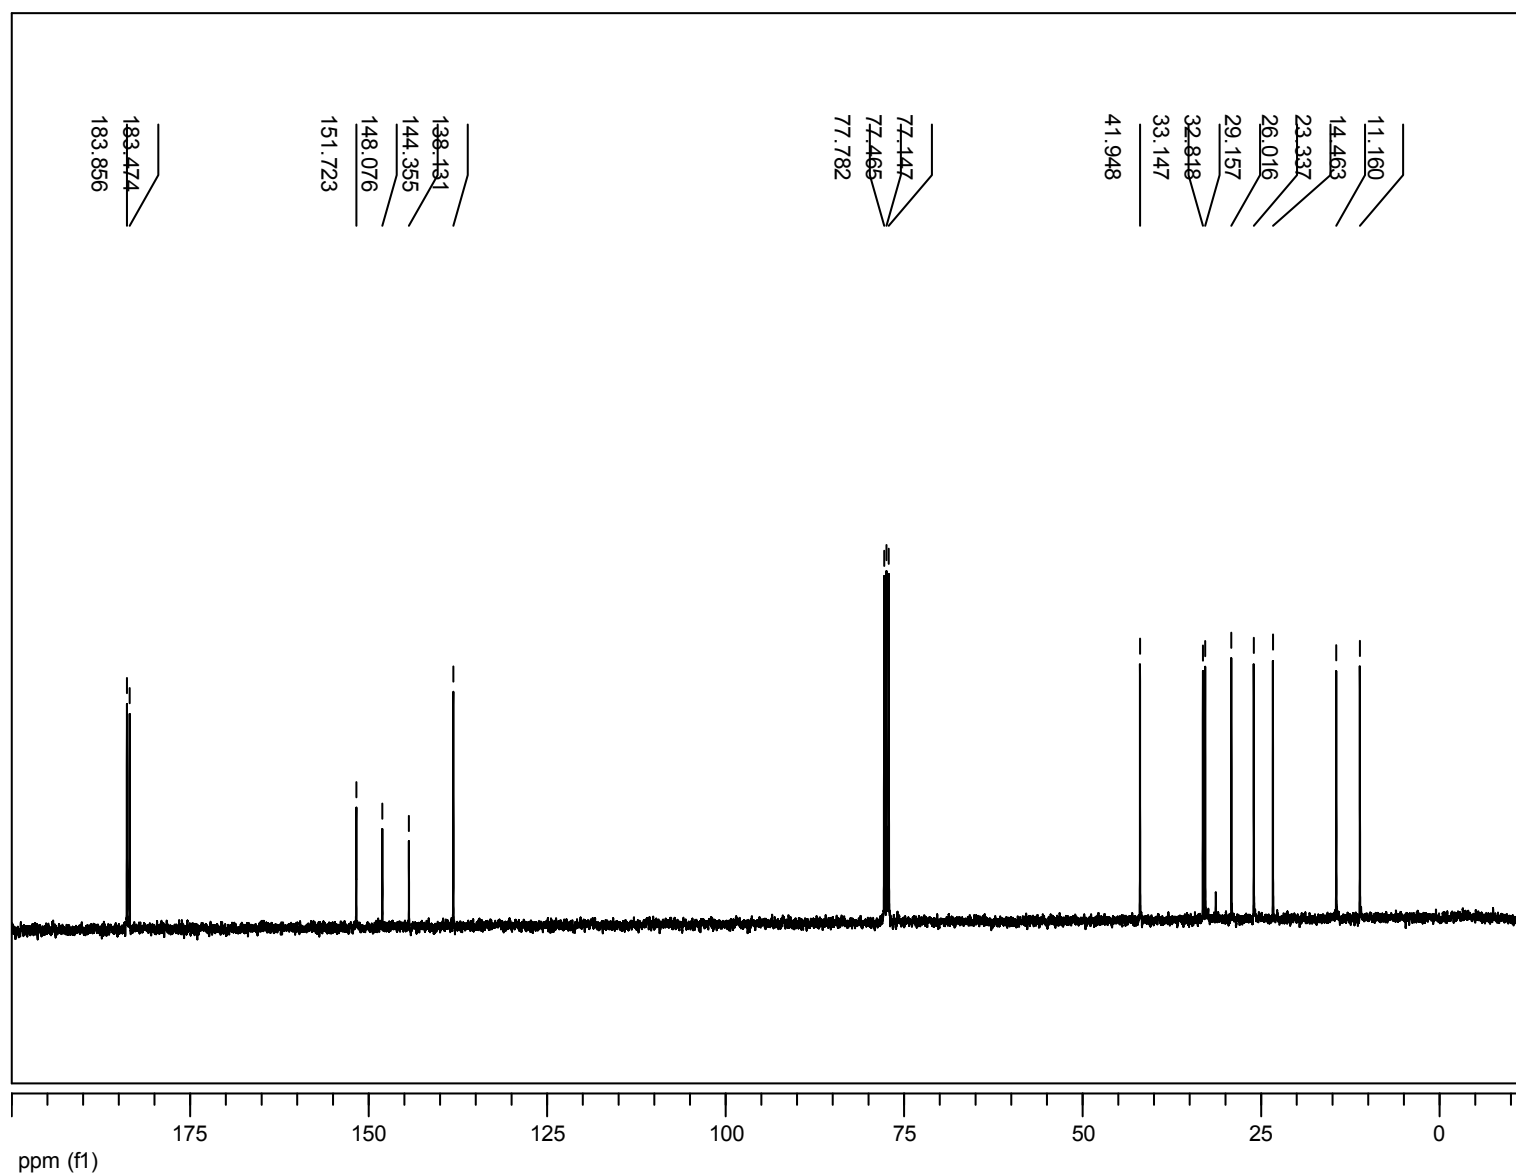

Figure S4.  $^{13}\text{C}$  NMR spectrum of 3-(2-ethylhexyl) thiophene-2,5-dicarbaldehyde.

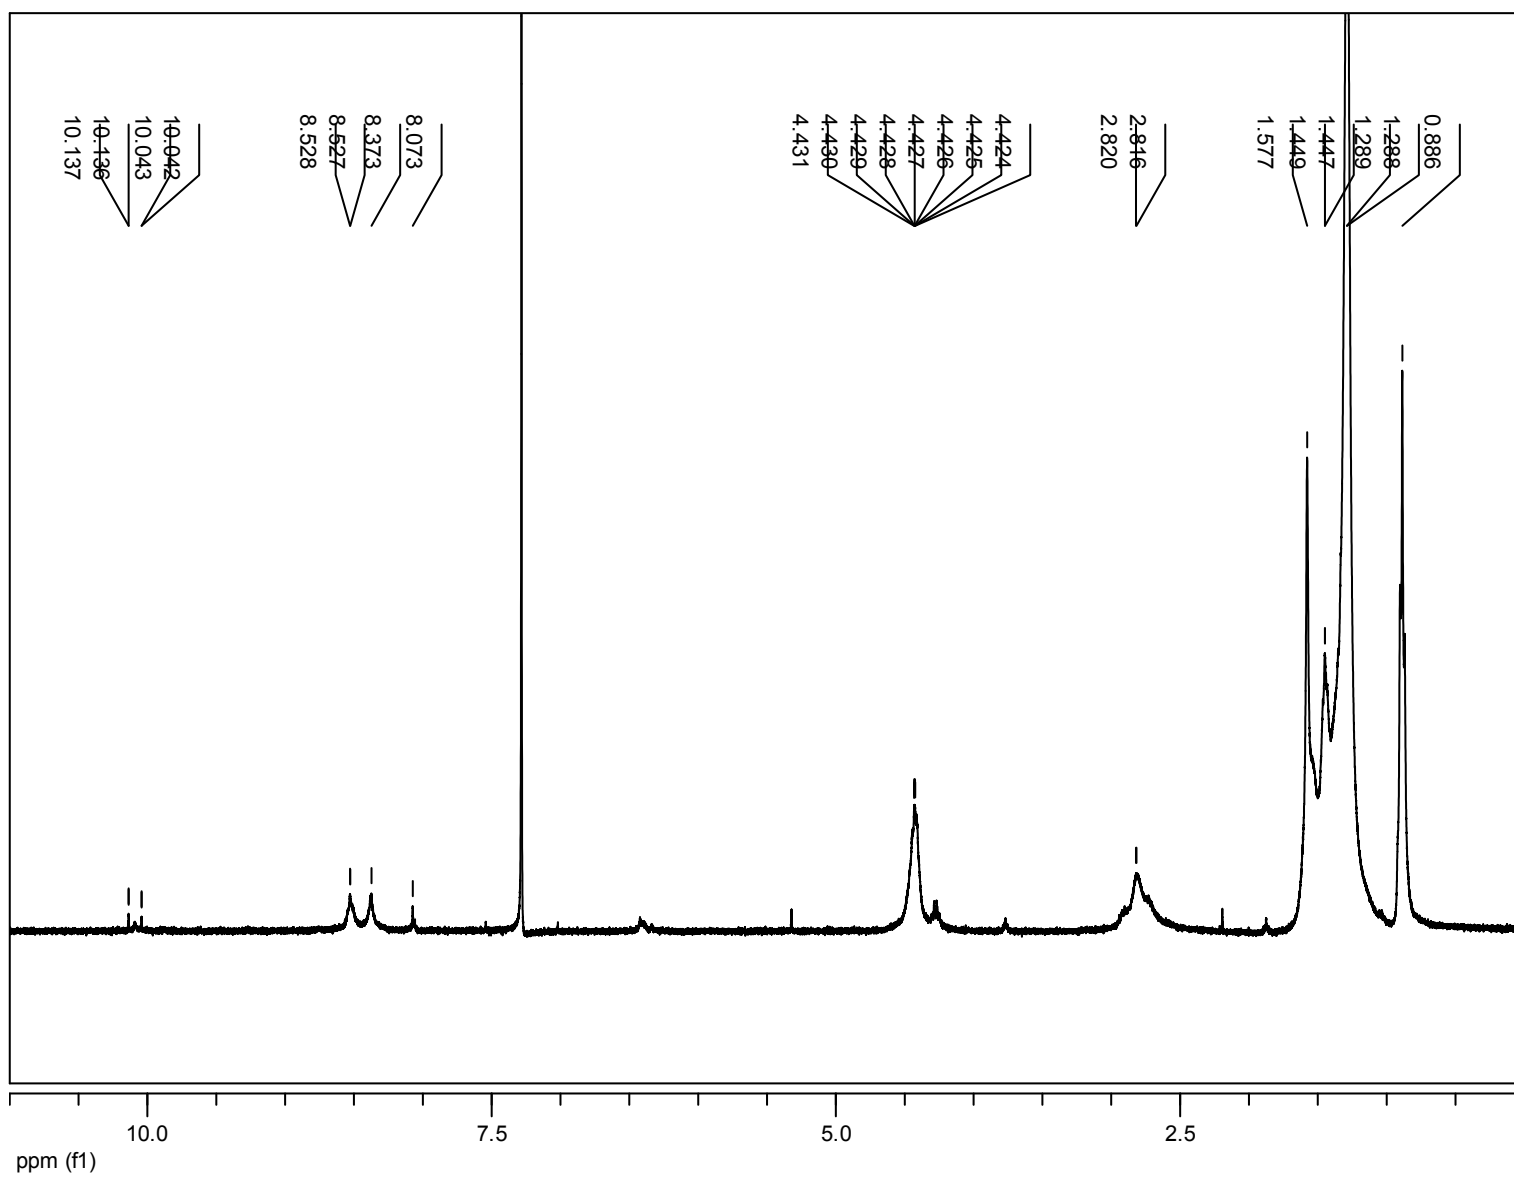

Figure S5. <sup>1</sup>H NMR spectrum of 2.

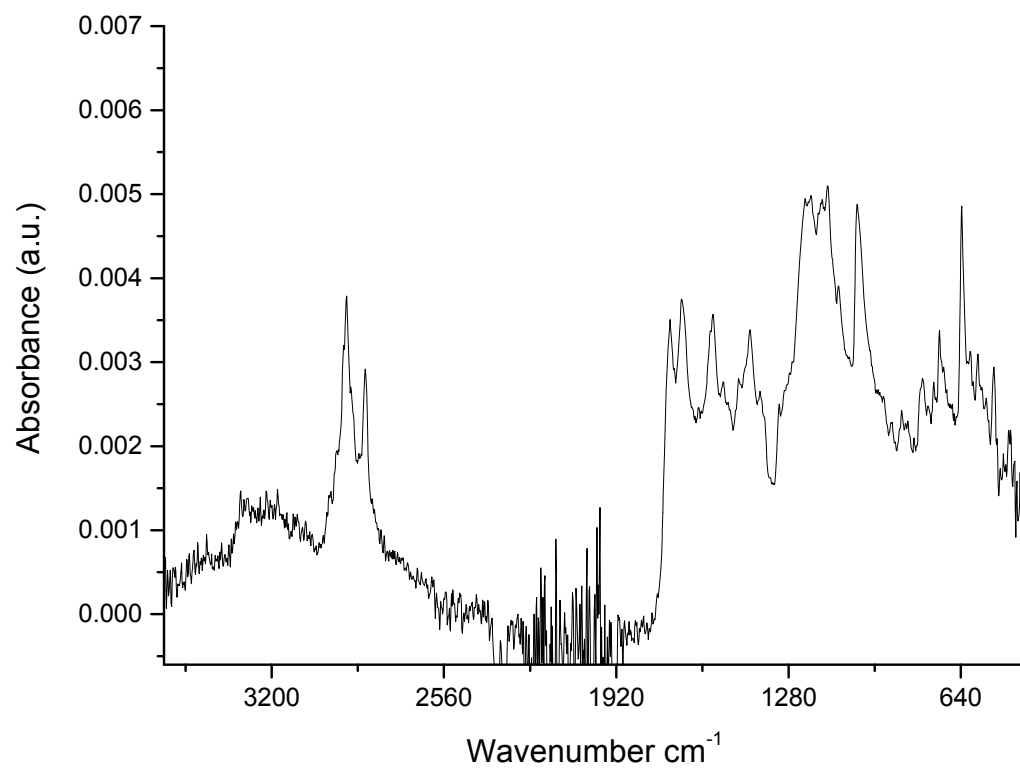

Figure S6. FT-IR spectrum of **1**.



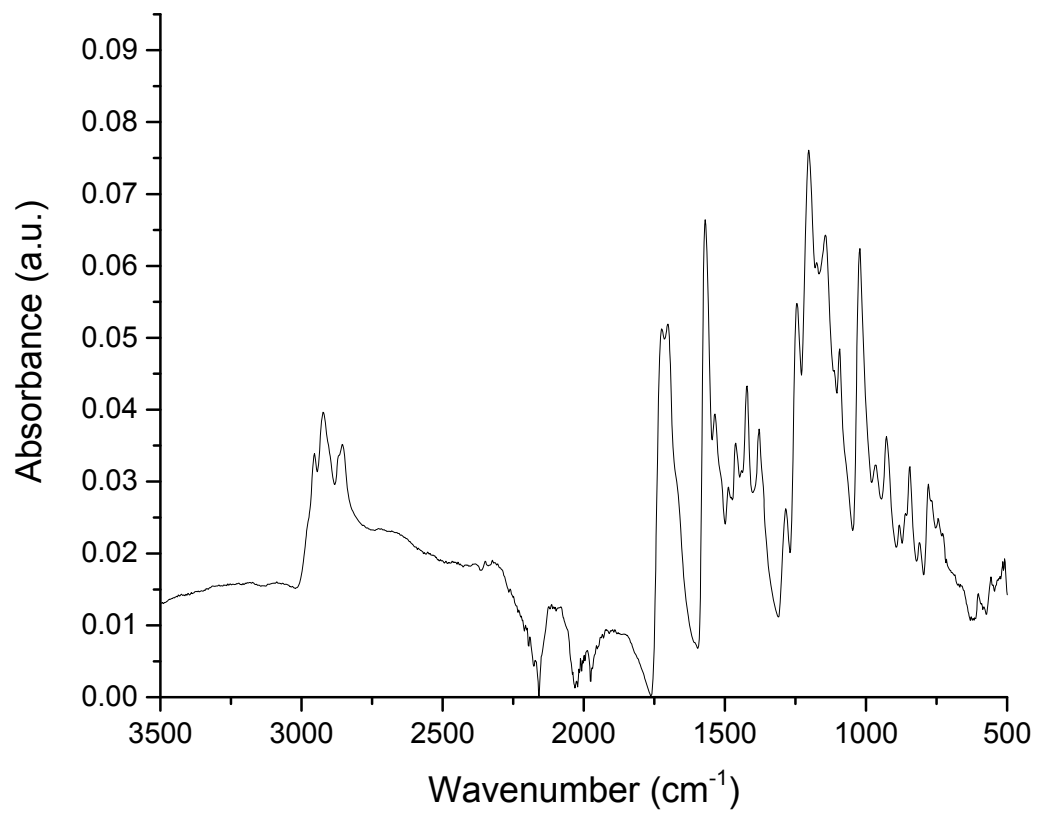

Figure S7. FT-IR spectrum of **2**.

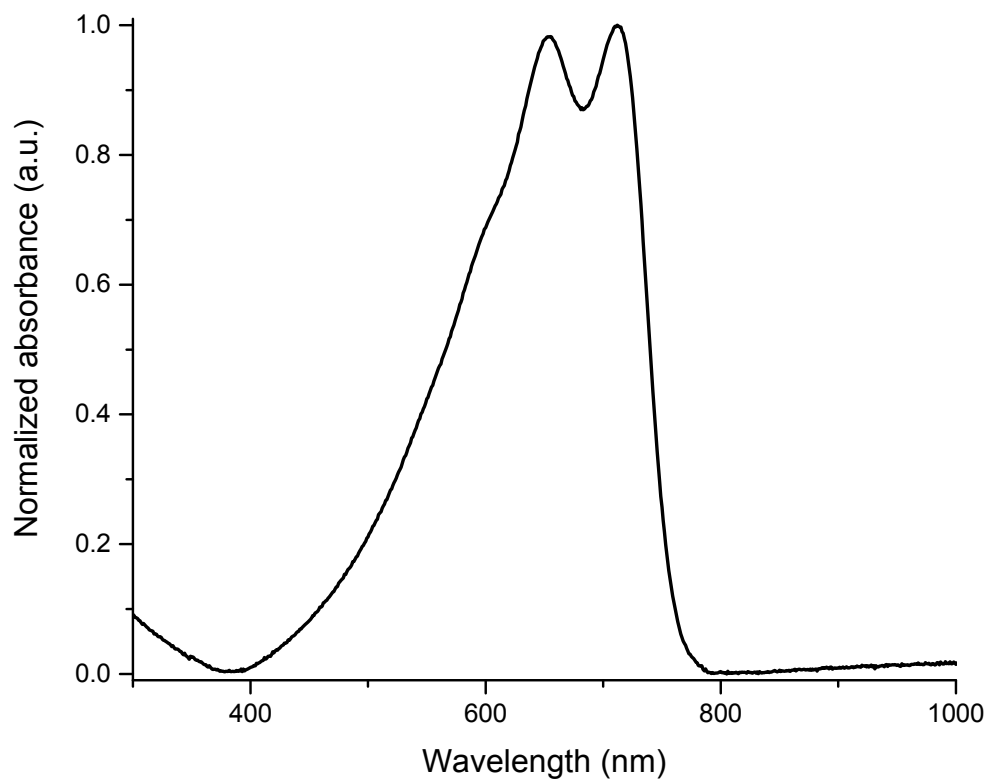

Figure S8. Normalized absorbance of **2** in dichloromethane.

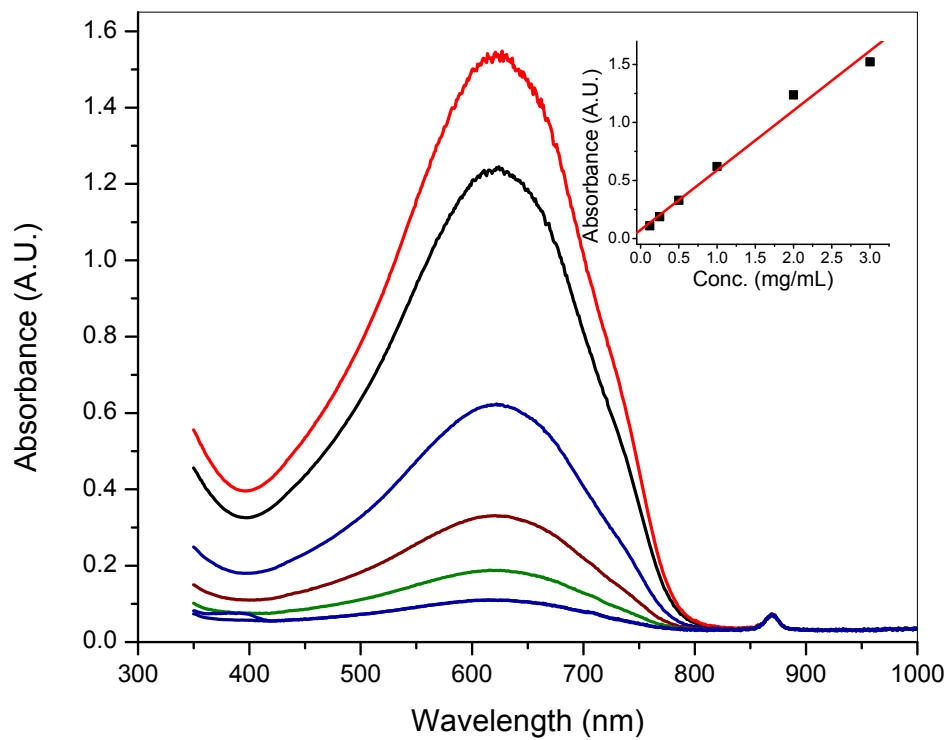

Figure S9. Absorbance of **1** as a function of concentration between 0.13 and 2 mg/mL in chloroform. Inset: absorbance of **1** at 625 nm as a function of concentration.

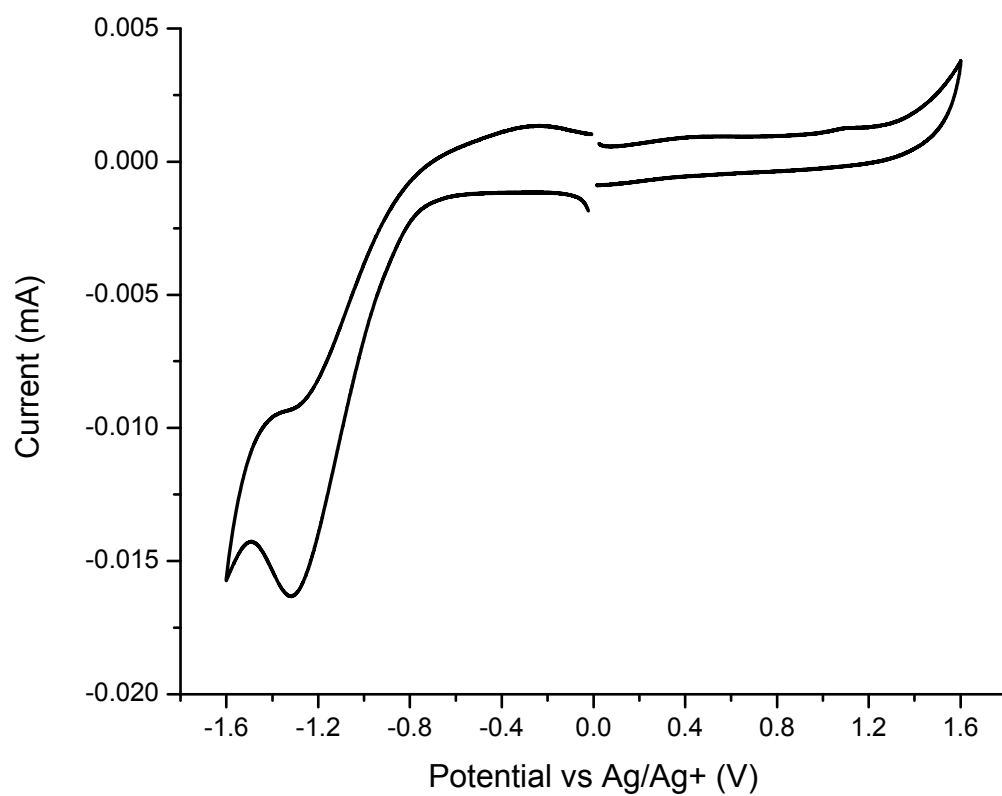

Figure 10. Cyclic voltammogram of **2** in dichloromethane measured at 100 mV/sec with TBAPF<sub>6</sub> against Ag/AgCl (sat'd) electrode in anhydrous dichloromethane.

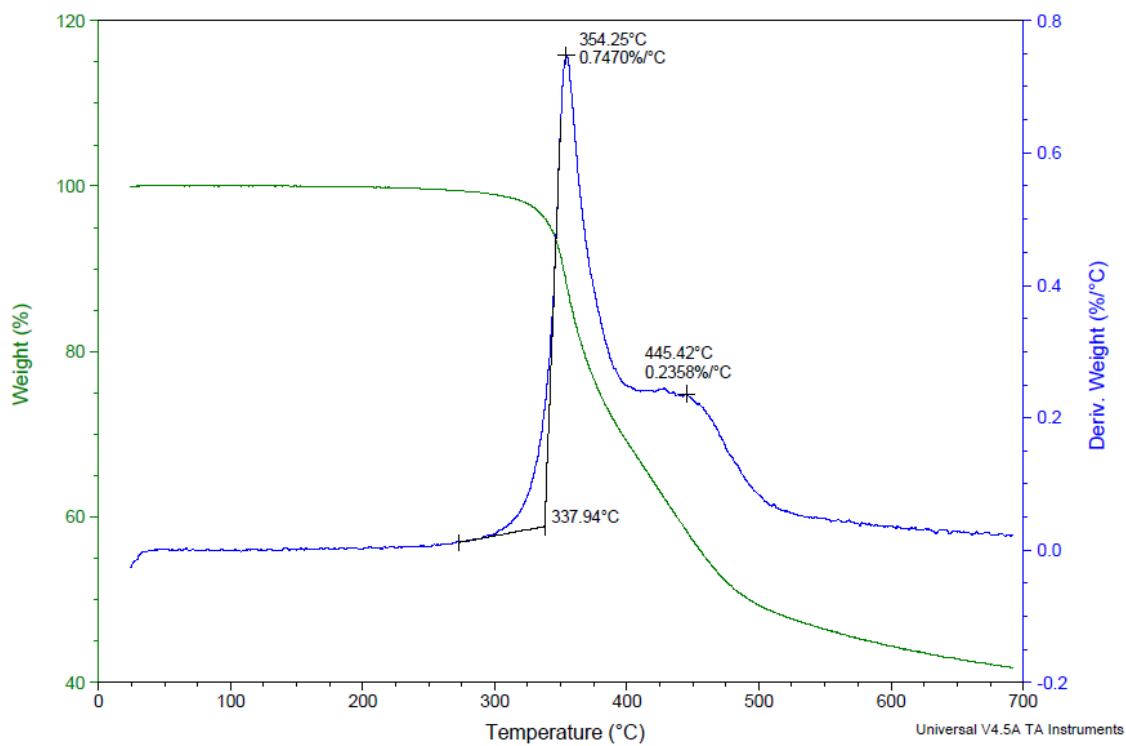

Figure S11. Thermal gravimetric analysis of **2**.

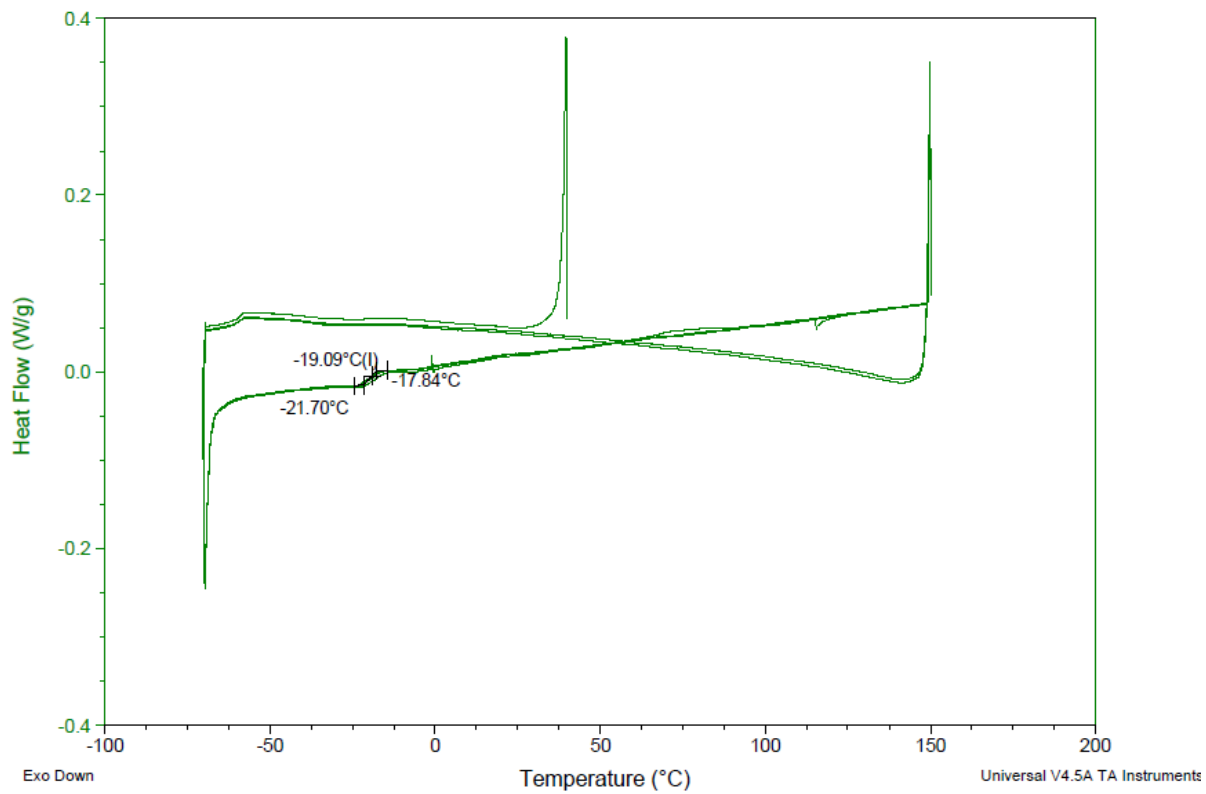

Figure S12. Differential scanning calorimetry thermograms of **2**.

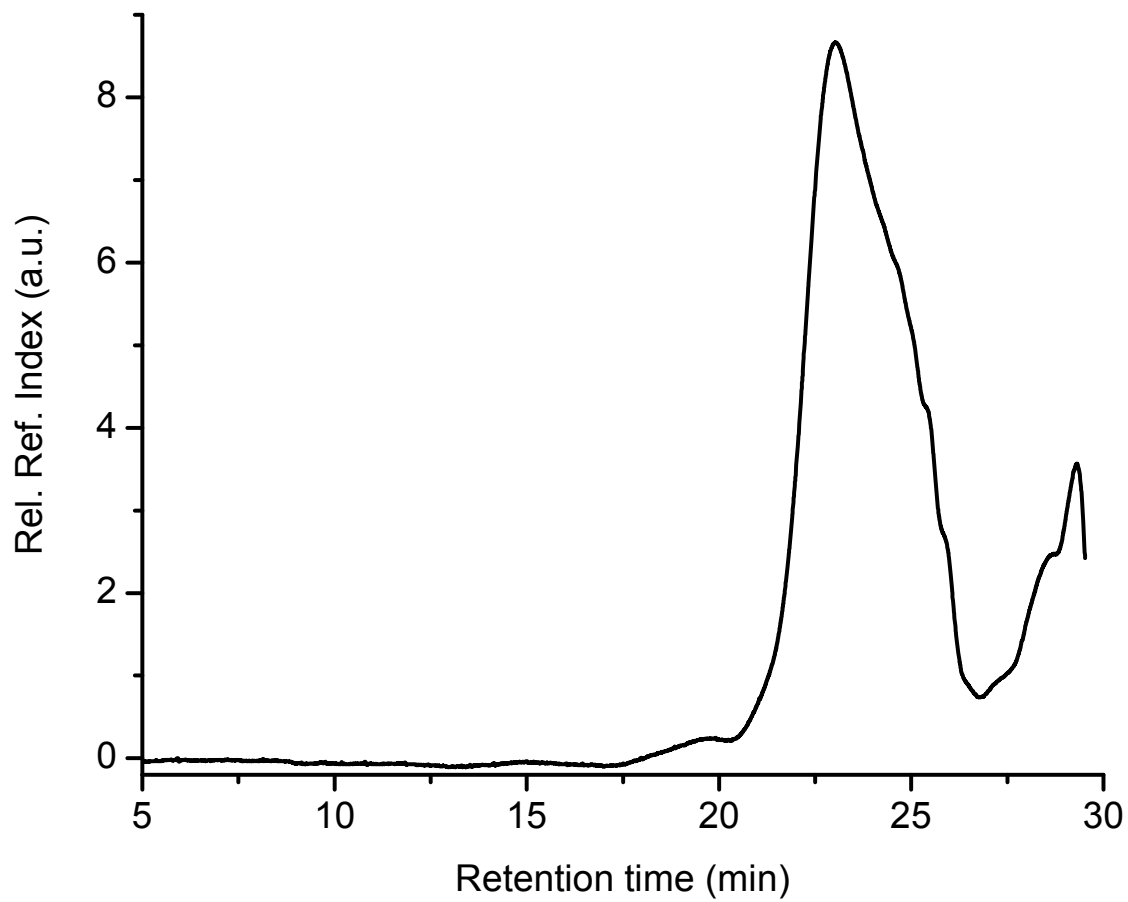

Figure S13. GPC elugram of **2**.

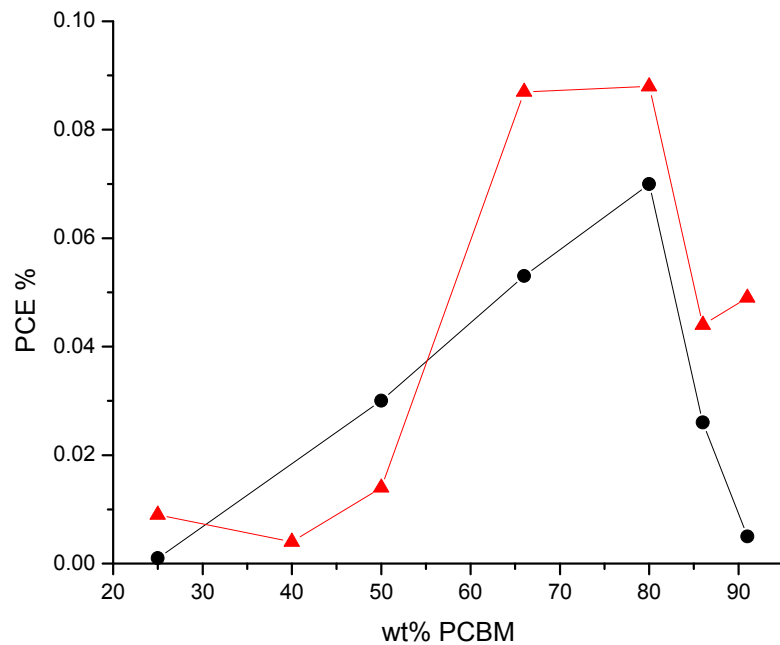

Figure S14. Unoptimized photovoltaic device power conversion efficiency as a function of the PC<sub>60</sub>BM content: **1** (■) and **3** (●).



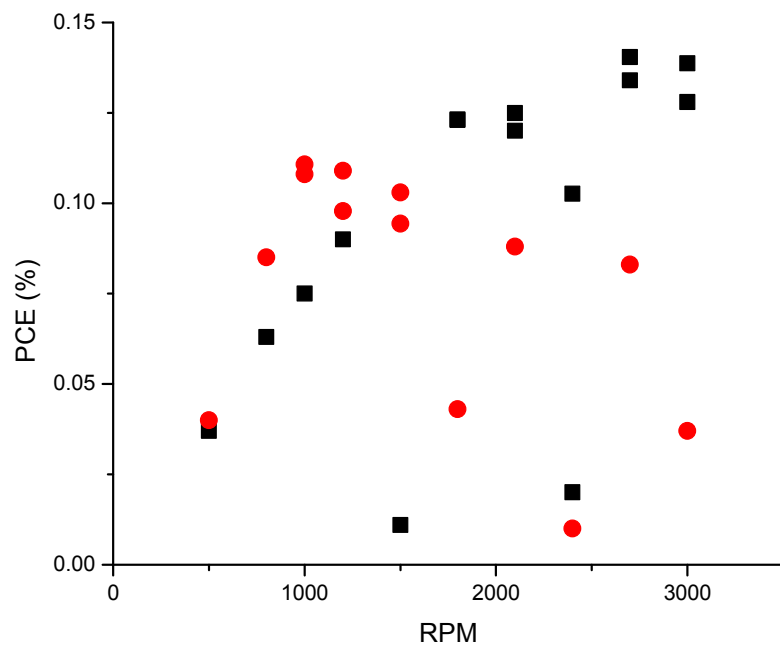

Figure S15. Unoptimized photovoltaic device power conversion efficiency with 1:4 1:PC<sub>60</sub>BM ratio as a function of spin coating speed/film thickness and donor/acceptor concentration: 10 (●) and 20 (■) mg/mL in chlorobenzene.

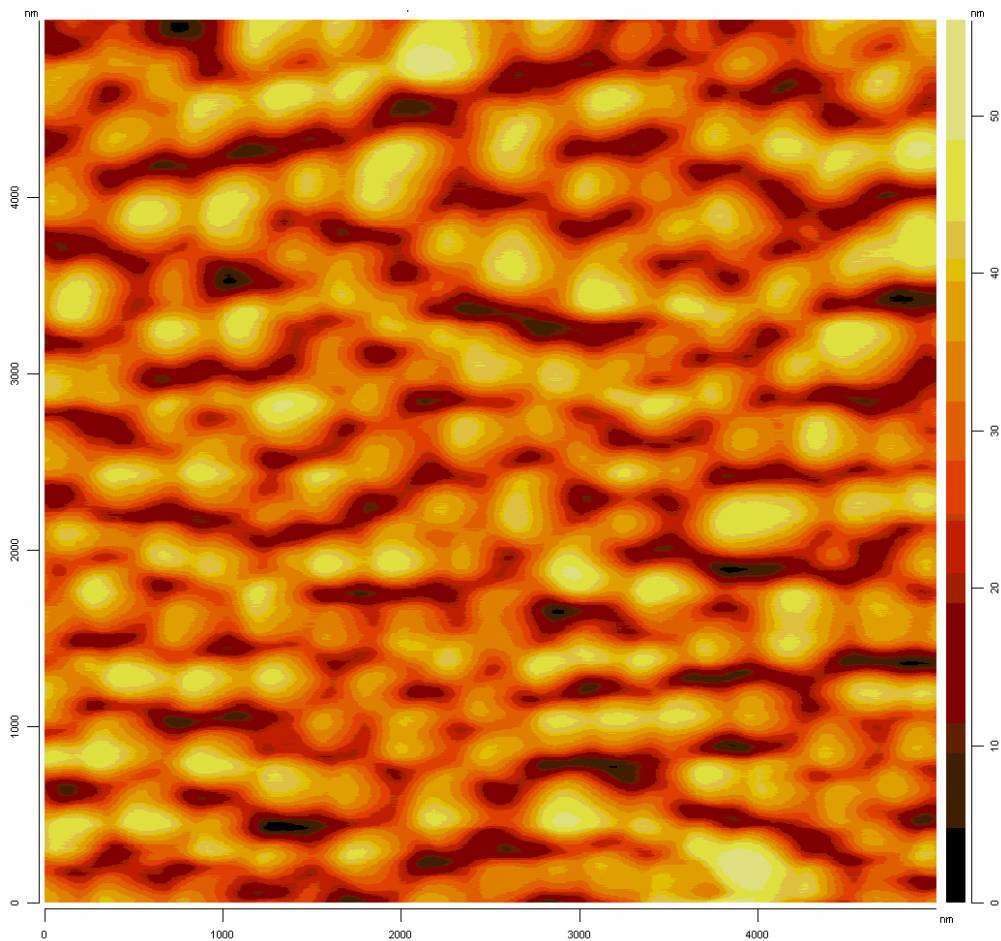

Figure S16. AFM topology image of 1:4 1:PC<sub>60</sub>BM blend in noncontact mode of 5 x 5 μm area.

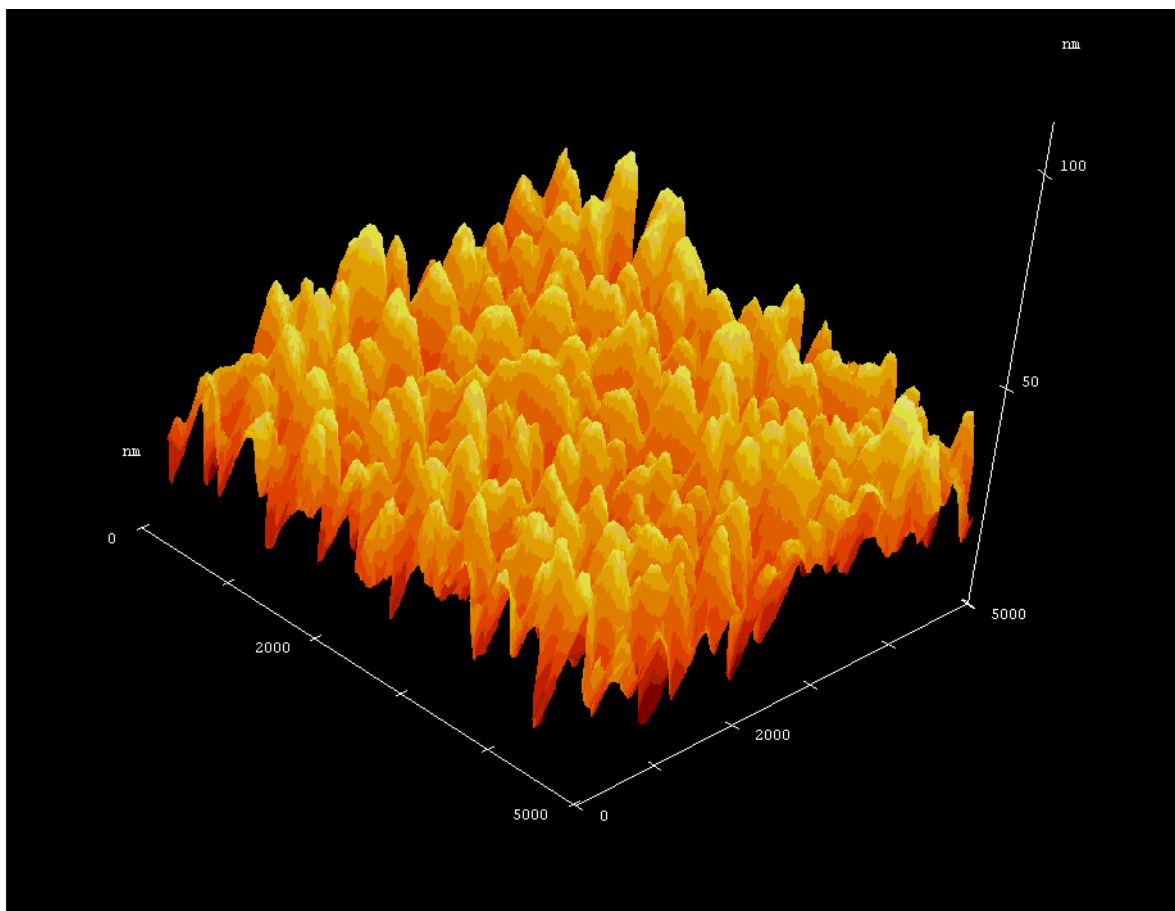

Figure S17. AFM image of 1:4 1:PC<sub>60</sub>BM blend in noncontact mode of 5 x 5 μm area showing the roughness.
